# Supplementary material
Source: publisher figshare collection journal article supplement (https://acs.figshare.com/ndownloader/files/4232269)
Supplement: Supplementary file 1 [file 4232269]

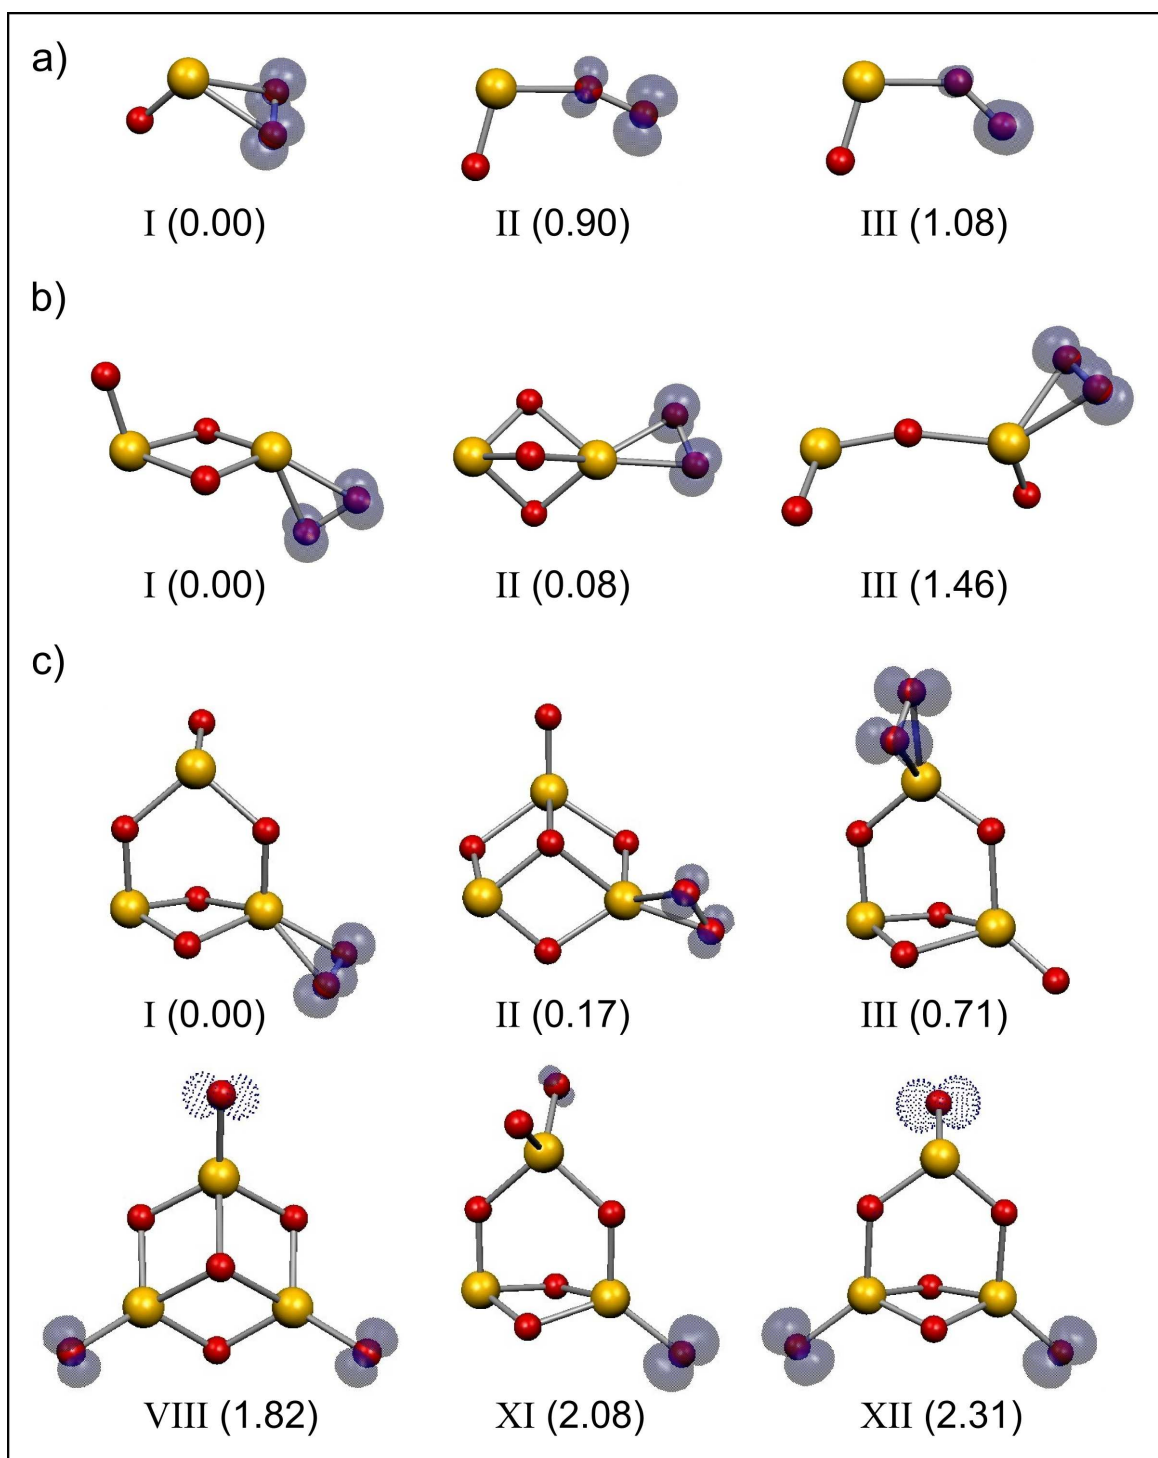

**Supp. S1** Calculated structural isomers for (a)  $\text{ZrO}_3^+$ , (b)  $\text{Zr}_2\text{O}_5^+$ , and (c)  $\text{Zr}_3\text{O}_7^+$  given in eV. The gray isosurfaces indicate localized spin density.

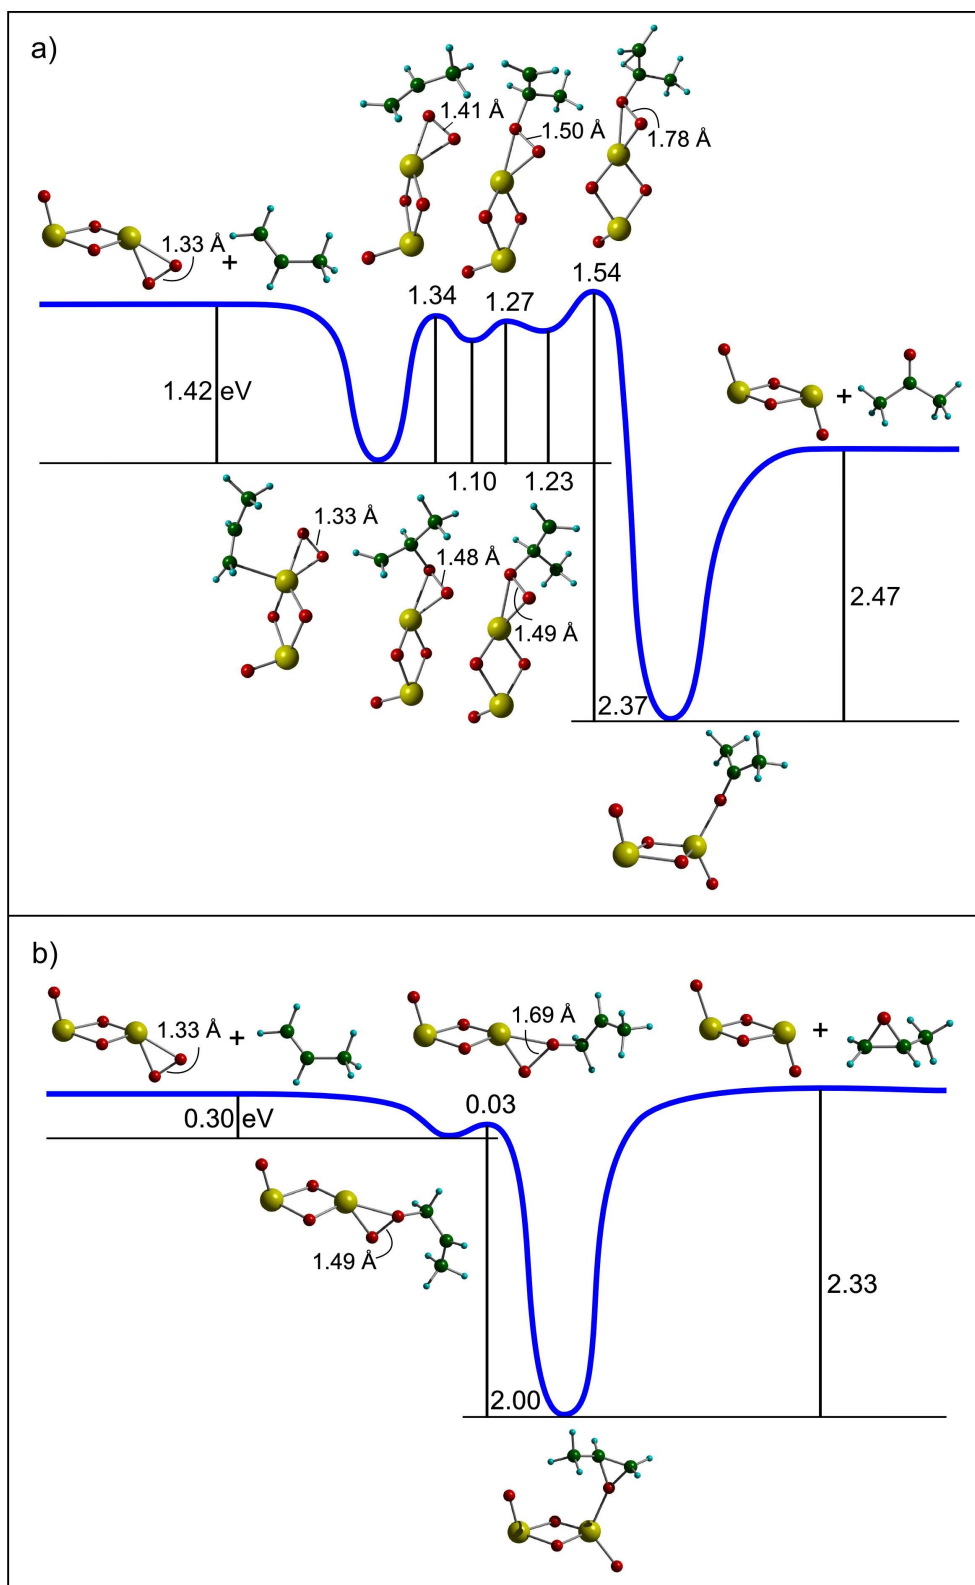

**Supp. S2** (a) A calculated energy profile given in eV for reaction of  $\text{Zr}_2\text{O}_5^+$  with  $\text{C}_3\text{H}_6$  forming acetone. (b) An additional calculated energy profile given in eV for reaction of  $\text{Zr}_2\text{O}_5^+$  with  $\text{C}_3\text{H}_6$  forming an epoxide.

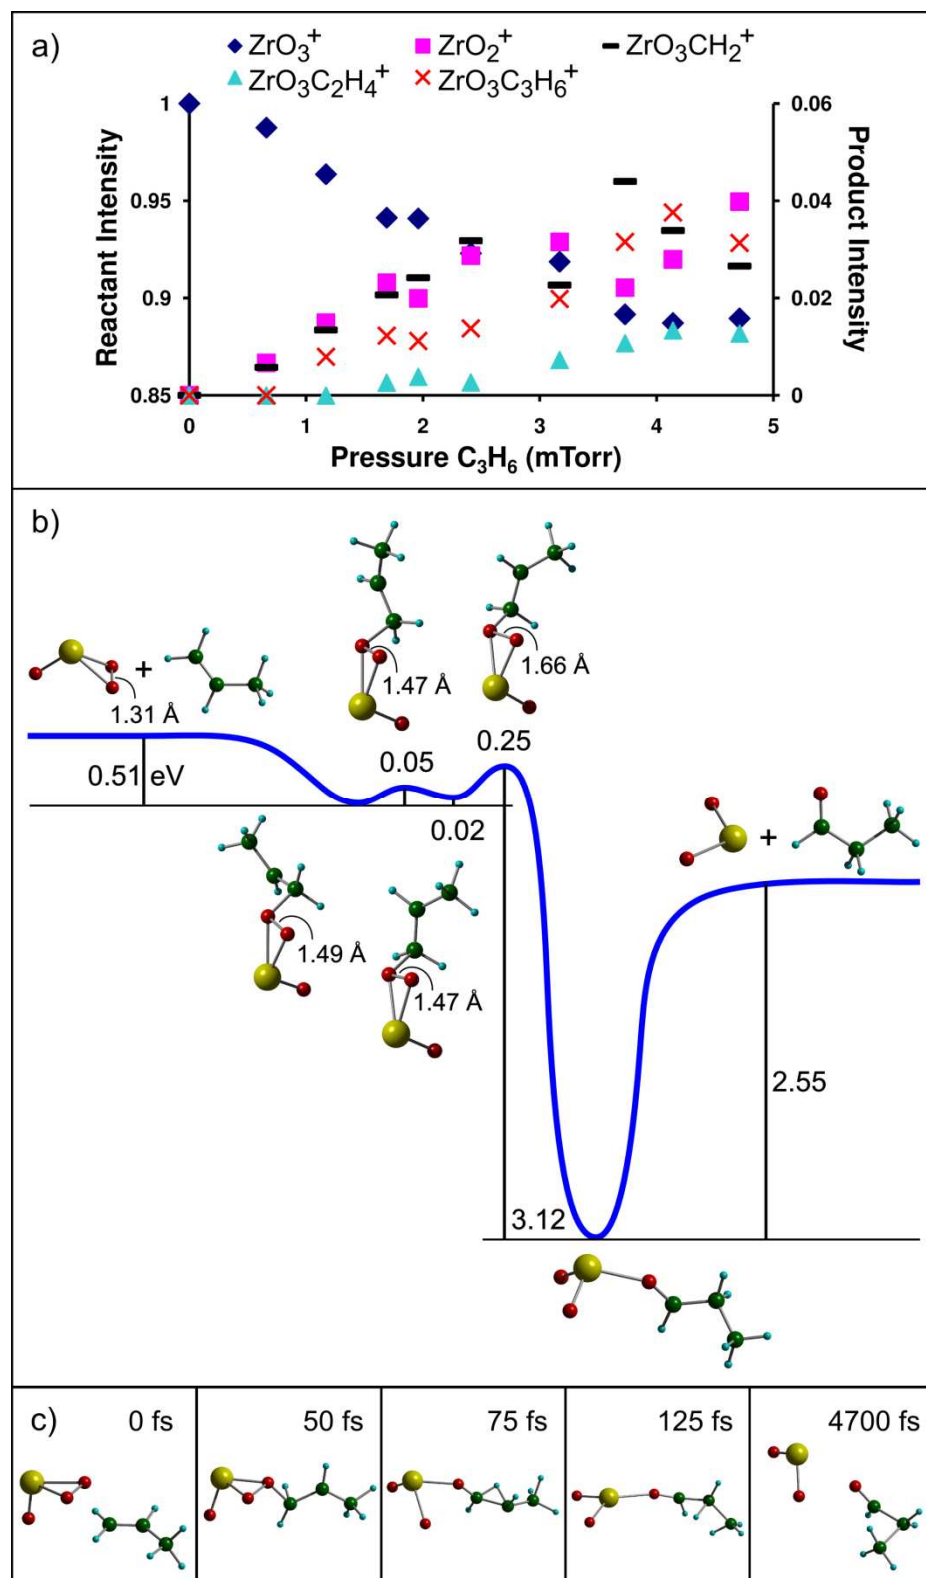

**Supp. S3** (a) Branching ratios presented in normalized ion intensities for the reaction  $ZrO_3^+$  with  $C_3H_6$ . (b) Calculated energy profile given in eV together with the structures and (c) snapshots from the MD simulations performed at constant temperature ( $T = 1200$  K) for reaction of  $ZrO_3^+$  with  $C_3H_6$  creating propanal.

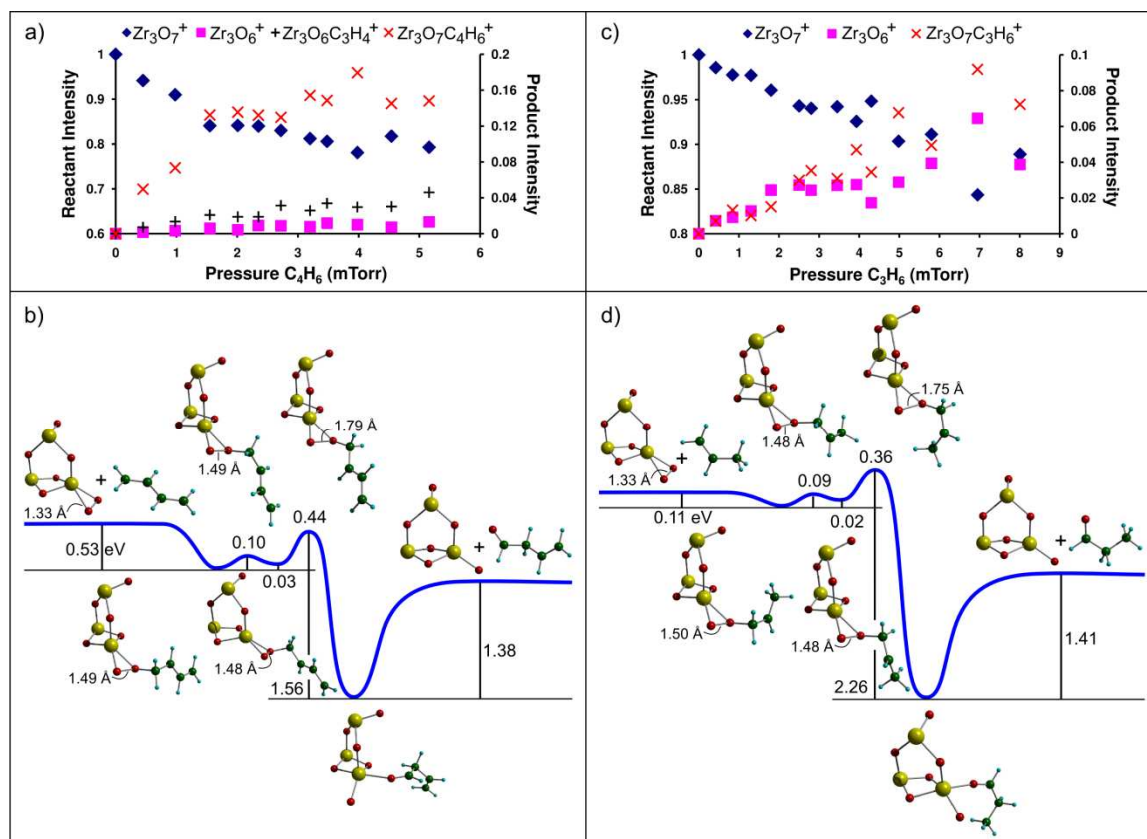

**Supp. S4** Branching ratios presented in normalized ion intensities for the reaction  $\text{Zr}_3\text{O}_7^+$  with (a)  $\text{C}_4\text{H}_6$  and (c)  $\text{C}_3\text{H}_6$ . Calculated energy profile given in eV for reaction of  $\text{Zr}_3\text{O}_7^+$  with (b)  $\text{C}_4\text{H}_6$  creating butenal and (d)  $\text{C}_3\text{H}_6$  creating propanal.
